# Supplementary material
Source: Springer Nature journal article supplement (https://www.springermedizin.de/resource/supplementary/12936_2011_1878_MOESM1_ESM.pdf/9541958)
Supplement: MOESM1 [file 9541958]

**4924 children from 2 months to 13 years old**

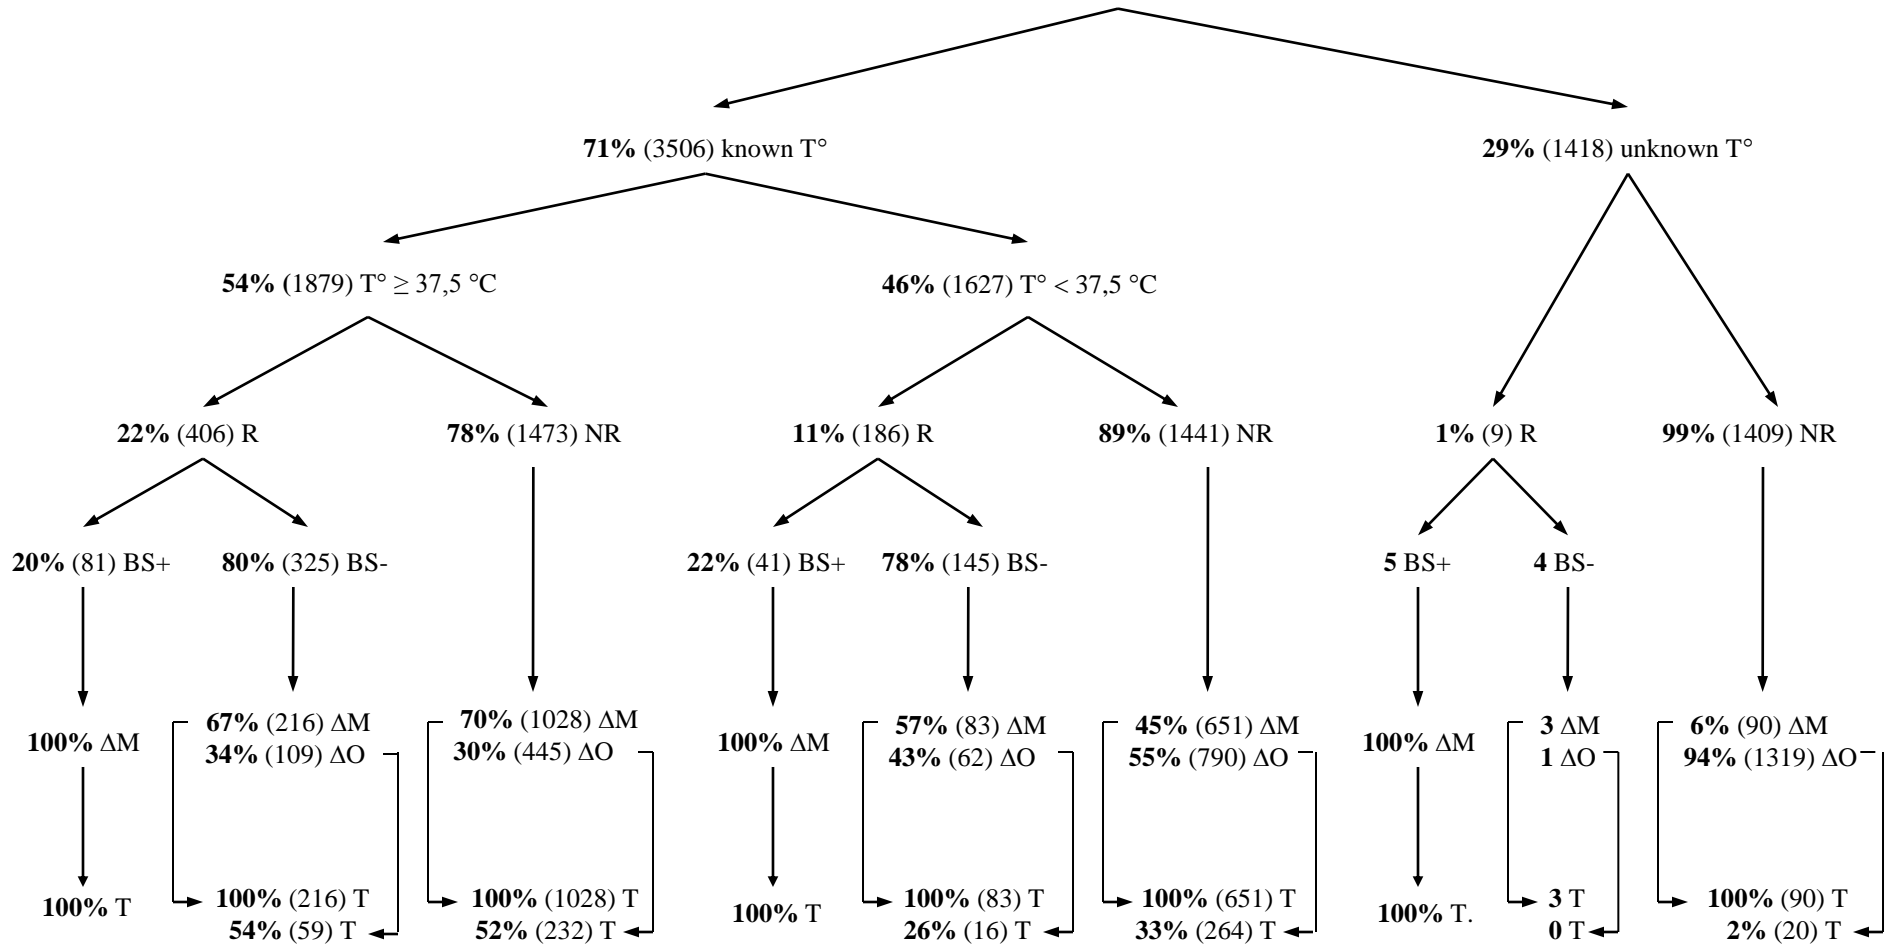

T°: Axillary Temperature  
 R: Referred to the laboratory facility  
 NR: Non-Referred to the laboratory facility  
 BS: Blood Smear  
 ΔM: Malaria diagnosis  
 ΔO: Other diagnosis  
 T : Treated with an antimalarial
